# Supplementary material
Source: Springer Nature journal article supplement (https://www.springermedizin.de/resource/supplementary/12885_2013_4540_MOESM8_ESM.pdf/9466542)

**A**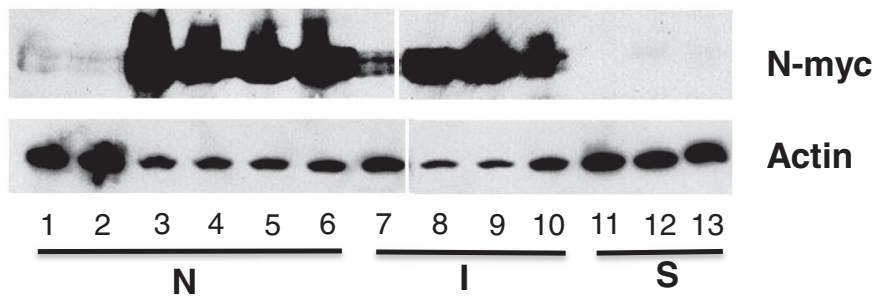**B****LA1-55n****SH-SY5Y**

As As Vec

Sense Sense Vec

miR-375

U6

**C**

miR-375

Hook1

GAPDH

1

2

3

Input DNA

N-myc Ab

Pol II Ab

2 Ab

Supplement: MOESM8 [file 9466542]
